# Supplementary material
Source: HighWire-hosted journal article supplement (https://bmjopen.bmj.com/content/11/2/e038992)
Supplement: inline-supplementary-material-1 [file inline-supplementary-material-1.pdf]

# SUPPLEMENTARY FILE

To estimate the group size, a pilot study was conducted for measuring the FLACC pain score at 12 h after surgery (7 patients in each group). We hypothesised that either QLB-III or TFPB could provide adequate pain relief when compared to the control and expected the capability to show a difference of 2 in the FLACC pain score at 12 h after surgery between any intervention group and the control group. The sample size calculation based on superiority test for two means with 90% power and 5% level of significance, 25 patients per group will be needed. Considering a compliance rate of 80 %, we asked 90 patients to participate in this study. The sample size was calculated by PASS 11 software.

Supplemental table: the FLACC score at 12h postoperatively(at rest)

| Control group | QLB-III group | TFPB group |
|---------------|---------------|------------|
| 4             | 1             | 1          |
| 5             | 3             | 2          |
| 6             | 2             | 4          |
| 6             | 3             | 1          |
| 8             | 3             | 3          |
| 7             | 2             | 2          |
| 3             | 2             | 2          |

Parameters assumption for calculating the sample size of superiority test for two means

|                 |                                     |                                             |
|-----------------|-------------------------------------|---------------------------------------------|
| QLB vs Control  | Mean of QLB at 12h postoperatively  | Mean <sub>qlb</sub> =2.29                   |
|                 | Mean of Con at 12h postoperatively  | Mean <sub>control</sub> =5.57               |
|                 | SD of QLB at 12h postoperatively    | SD <sub>qlb</sub> = 0.76                    |
|                 | SD of Con at 12h postoperatively    | SD <sub>control</sub> =1.72                 |
|                 | Superiority Margin                  | 2                                           |
|                 | $\alpha$                            | $\alpha=0.025$                              |
|                 | $\beta$                             | $\beta=0.90$                                |
|                 | Sample size of QLB and Con          | N <sub>qlb</sub> =N <sub>control</sub> =25  |
| TFPB vs Control | Mean of TFPB at 12h postoperatively | Mean <sub>tfpb</sub> =2.14                  |
|                 | Mean of Con at 12h postoperatively  | Mean <sub>control</sub> =5.57               |
|                 | SD of TFPB at 12h postoperatively   | SD <sub>tfpb</sub> = 1.07                   |
|                 | SD of Con at 12h postoperatively    | SD <sub>control</sub> =1.72                 |
|                 | Superiority Margin                  | 2                                           |
|                 | $\alpha$                            | $\alpha=0.025$                              |
|                 | $\beta$                             | $\beta=0.90$                                |
|                 | Sample size of TFPB and Con         | N <sub>tfpb</sub> =N <sub>control</sub> =23 |
